# Supplementary material for: DppfCuBH4: new reducing agents for the synthesis of ferrocene-functionalized metal nanoclusters
Source: Royal Society of Chemistry journal article supplement (doi:10.1039/d3dt01461d), 2023-01-01
Supplement: d3dt01461d1.pdf [file d3dt01461d1.pdf]

## Supplementary Information

### **DppfCuBH<sub>4</sub>: new reducing agents for the synthesis of ferrocene-functionalized metal nanoclusters**

Meng Wang,<sup>ab+</sup> Simin Li,<sup>a+</sup> Huijun Chen,<sup>c+</sup> Xueli Sun,<sup>a</sup> Jing Sun,<sup>a</sup> Yanyuan Jia,<sup>b\*</sup> Shuo Guo<sup>b</sup>, Cunfa Sun<sup>d\*</sup> and Hui Shen<sup>a\*</sup>

<sup>a</sup> College of Energy Materials and Chemistry, Inner Mongolia University, Hohhot 010021, China. Email: shen@imu.edu.cn.

<sup>b</sup> China College of Chemistry and Chemical Engineering, Inner Mongolia University, Hohhot 010021, China. Email: jiayanyuan@imu.edu.cn.

<sup>c</sup> College of Food Science and Pharmaceutical Engineering, Wuzhou University, Guangxi, 543000, China.

<sup>d</sup> College of Materials Science and Engineering, Huaqiao University, Xiamen 361021, China. E-mail: Cunfa.SUN@hqu.edu.cn

<sup>+</sup> These authors contribute equally to this work.

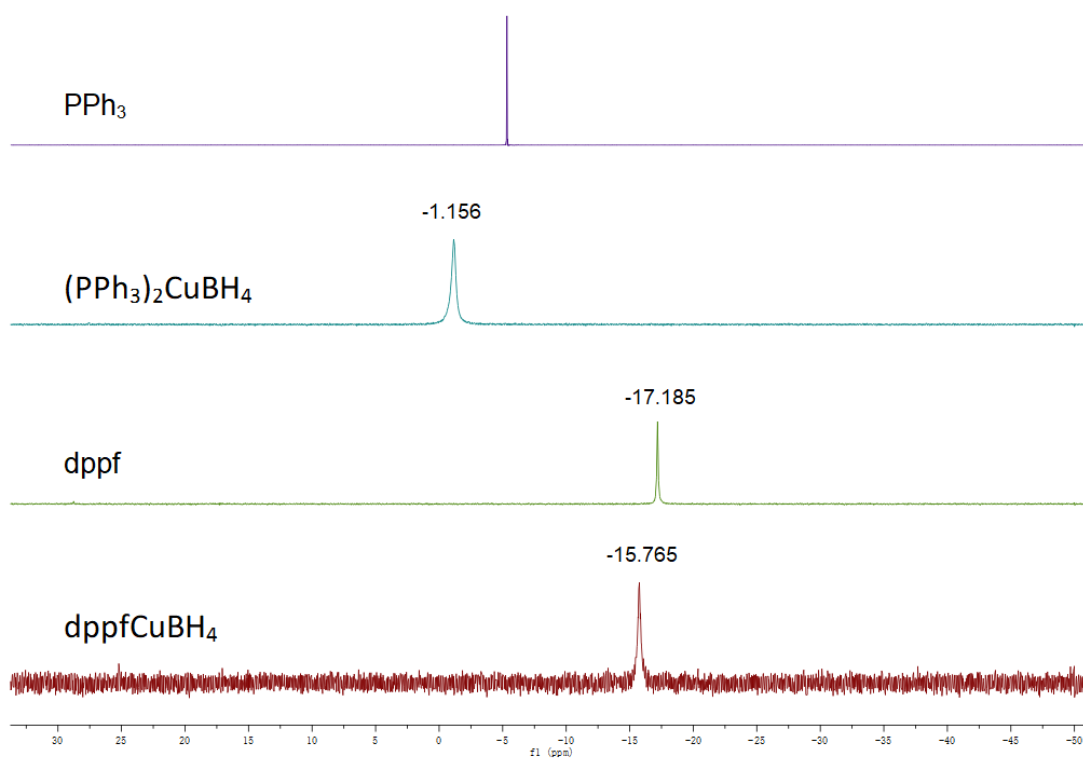

**Figure S1.**  $^{31}\text{P}$  NMR track in the synthesis of dppfCuBH<sub>4</sub>.

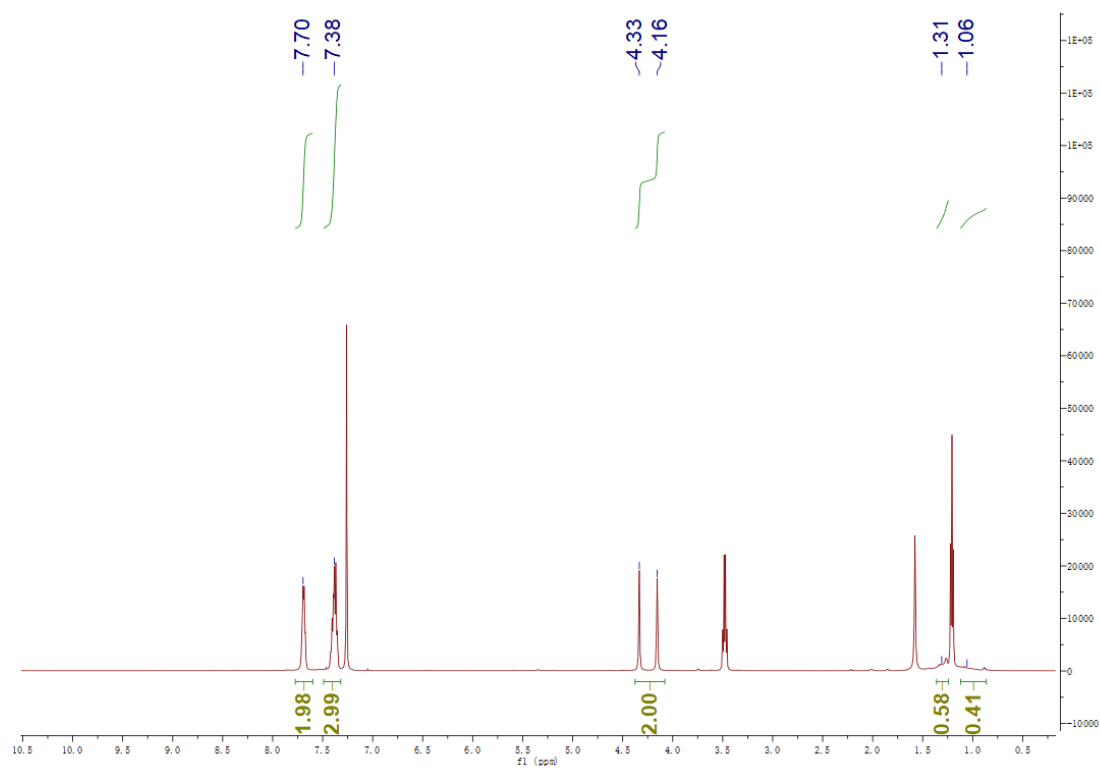

**Figure S2.**  $^1\text{H}$  NMR spectrum of  $\text{dppfCuBH}_4$  ( $\text{CDCl}_3$ ).

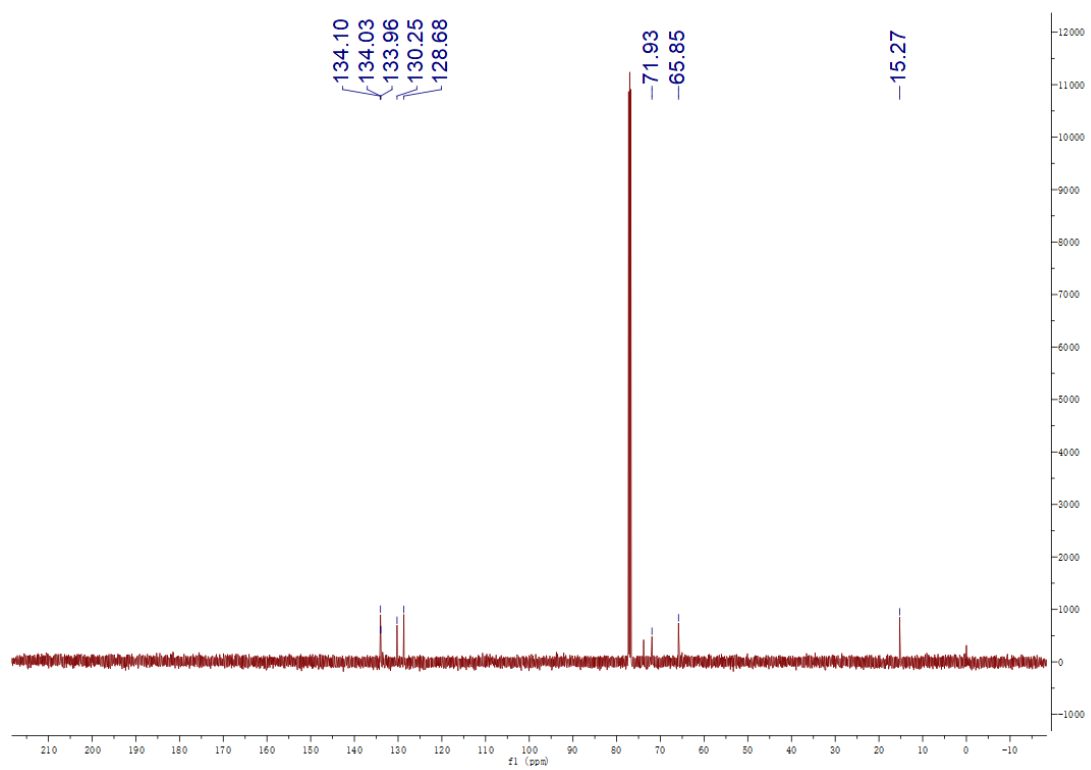

**Figure S3.**  $^{13}\text{C}$  NMR spectrum of  $\text{dppfCuBH}_4$  ( $\text{CDCl}_3$ ).

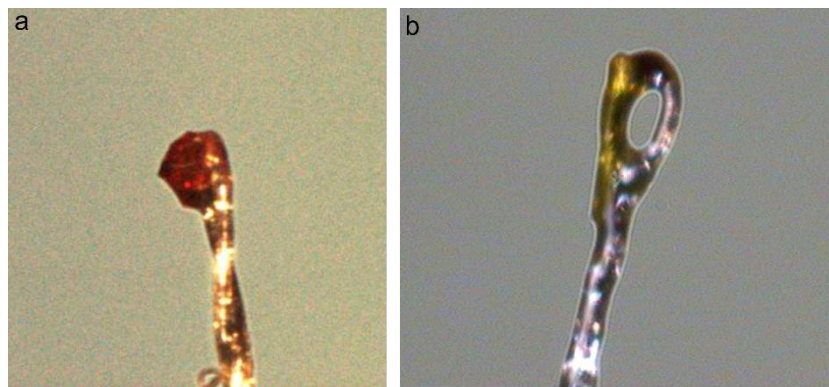

**Figure S4.** Digital photographs of single crystals of **1** (a) and **2** (b) clusters.

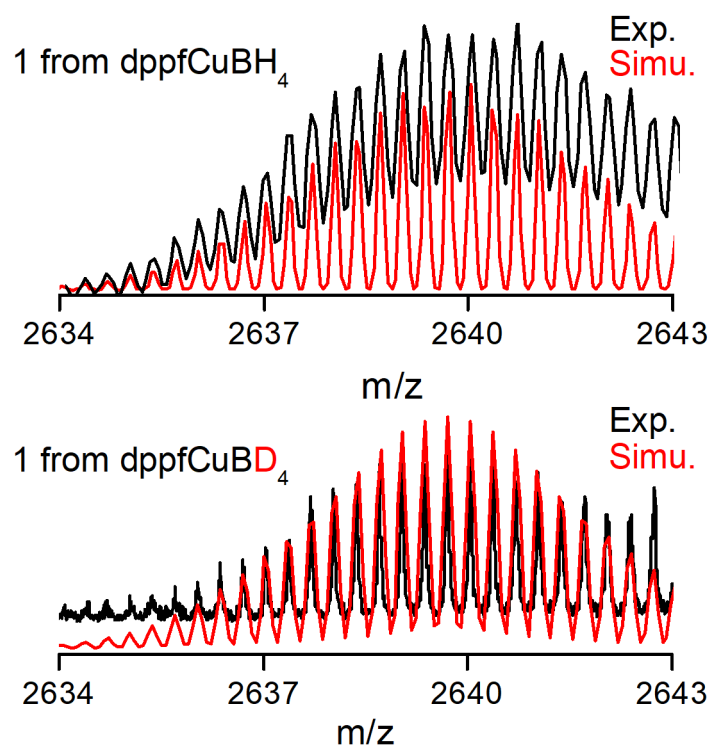

**Figure S5.** The comparison of mass spectra of cluster **1** prepared from NaBH<sub>4</sub> and NaBD<sub>4</sub>. The same peak position reveals that no hydride atoms are present in **1**.

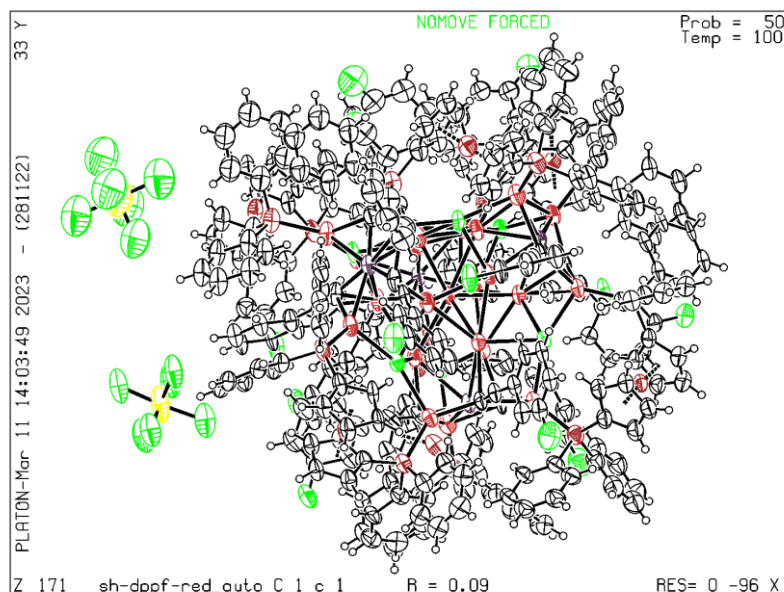

**Figure S6.** The thermal ellipsoids of the ORTEP diagram of **1**.

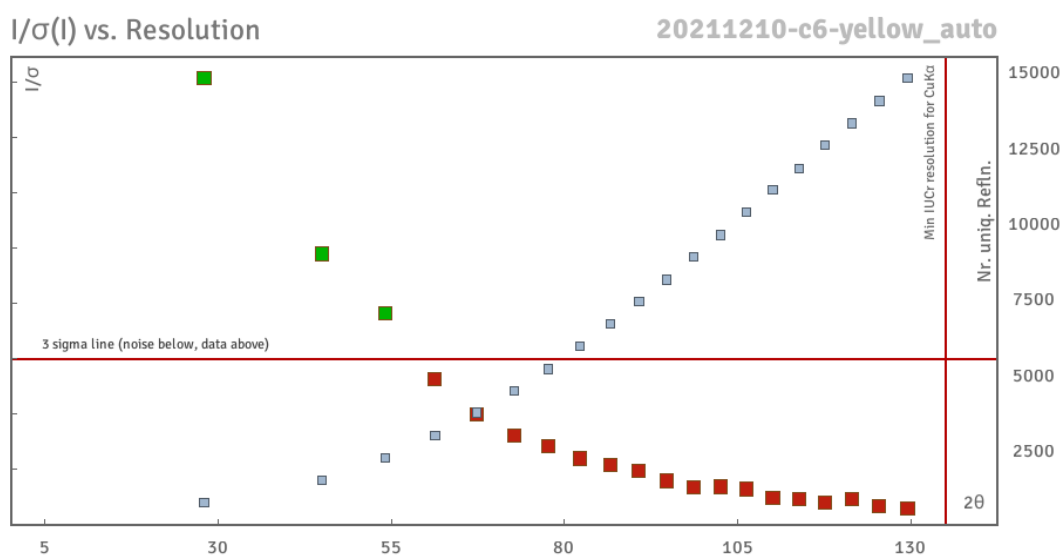

**Figure S7.** The  $I/\sigma$  vs. resolution plot of **2**. Note: during single crystal X-ray diffraction of **2** (CCDC 2250407), serious radiation damage was observed for the crystal when being exposed for a long time. This thus makes it rather difficult to satisfy the data requirement of  $I/\sigma > 3$  for all conditions, namely,  $2\theta \leq 130^\circ$  (Resolution  $\geq 0.84 \text{ \AA}$ ). To satisfy the requirement of completeness and enhance the quality of the diffraction images, we thus attempt to limit the exposure dose. Although  $I/\sigma$  is less than 3 for the scope of  $2\theta > 55^\circ$ , the resultant structure does not influence the discussion and conclusion of this work.

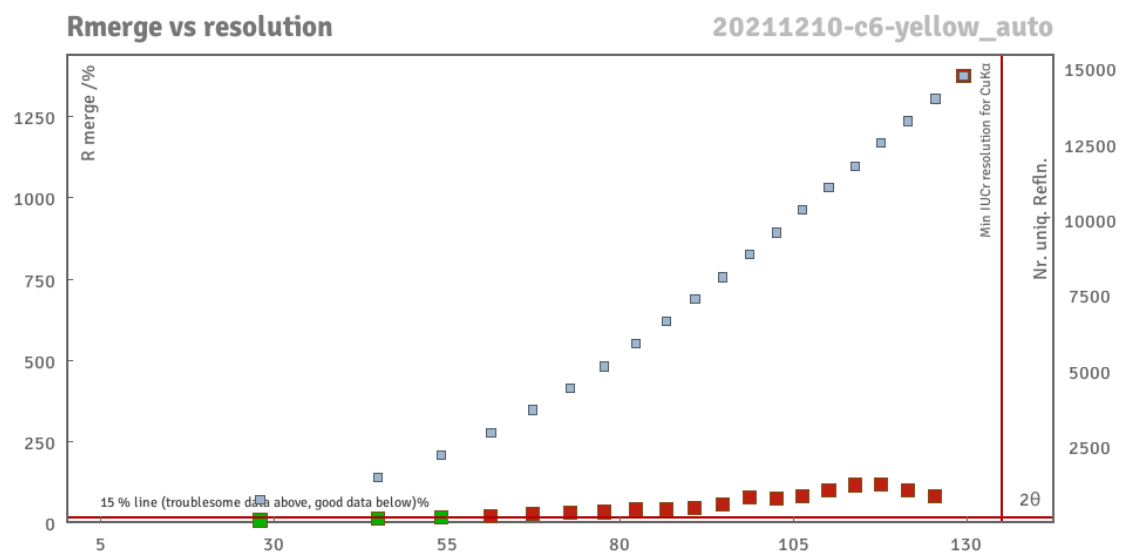

**Figure S8.** The  $R_{\text{merge}}$  vs. resolution plot of **2**.

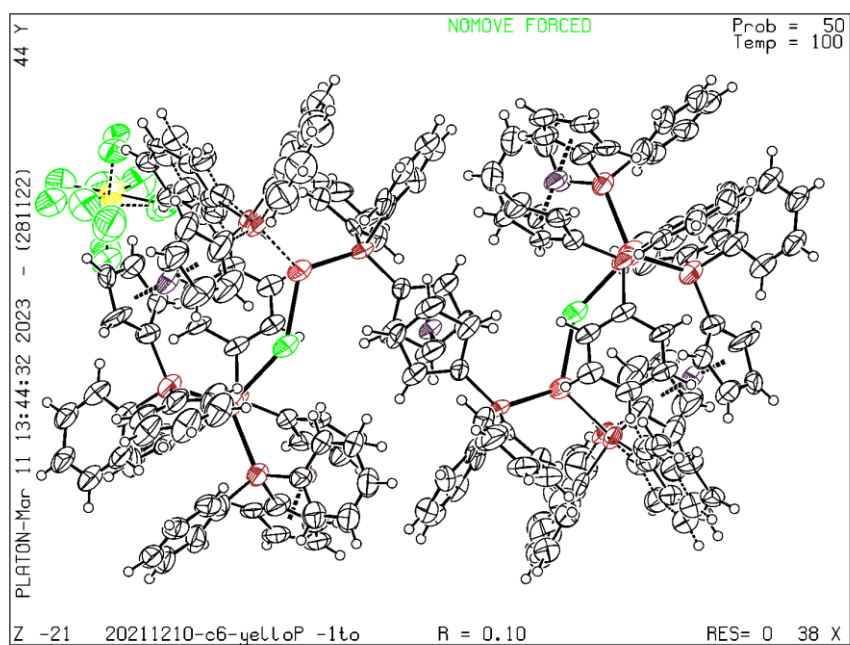

**Figure S9.** The thermal ellipsoids of the ORTEP diagram of **2**.

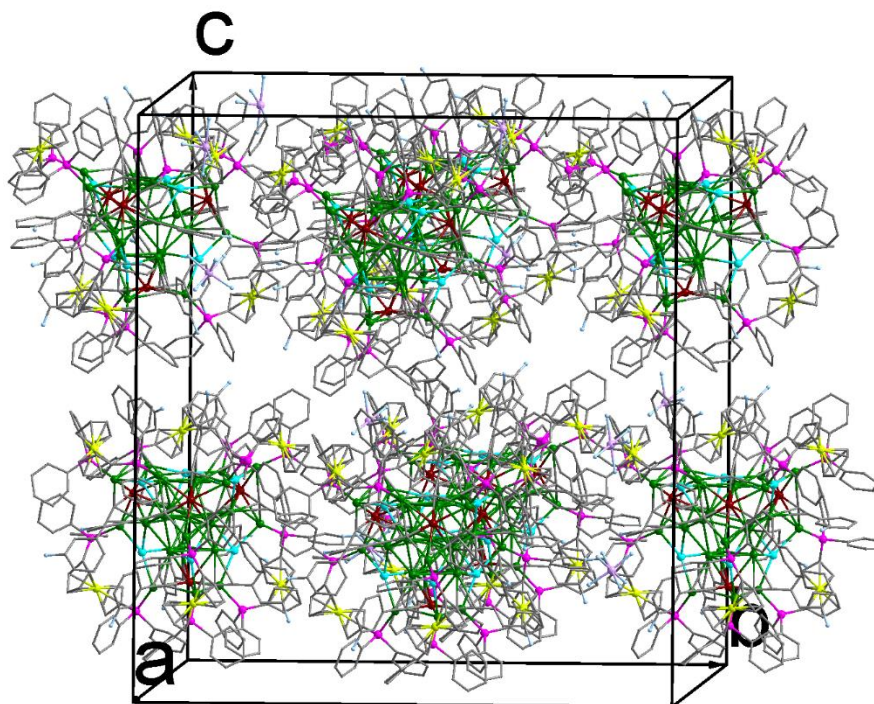

**Figure S10.** The packing structure of **1** in the unit cell. Color codes for atoms: green spheres, Ag; red spheres, Cu; yellow spheres, Fe; pink spheres, P; turquoise spheres, Cl; pale blue spheres, F; grey spheres, C; lavender spheres, Sb. All hydrogen atoms are omitted for clarity.

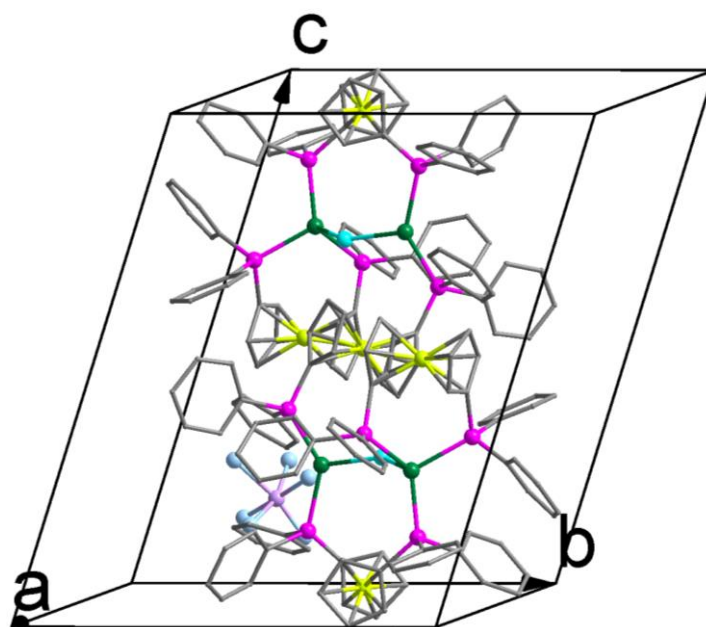

**Figure S11.** The packing structure of **2** in the unit cell. Color codes for atoms: green spheres, Ag; yellow spheres, Fe; pink spheres, P; turquoise spheres, Cl; pale blue spheres, F; grey spheres, C; lavender spheres, Sb. All hydrogen atoms are omitted for clarity.

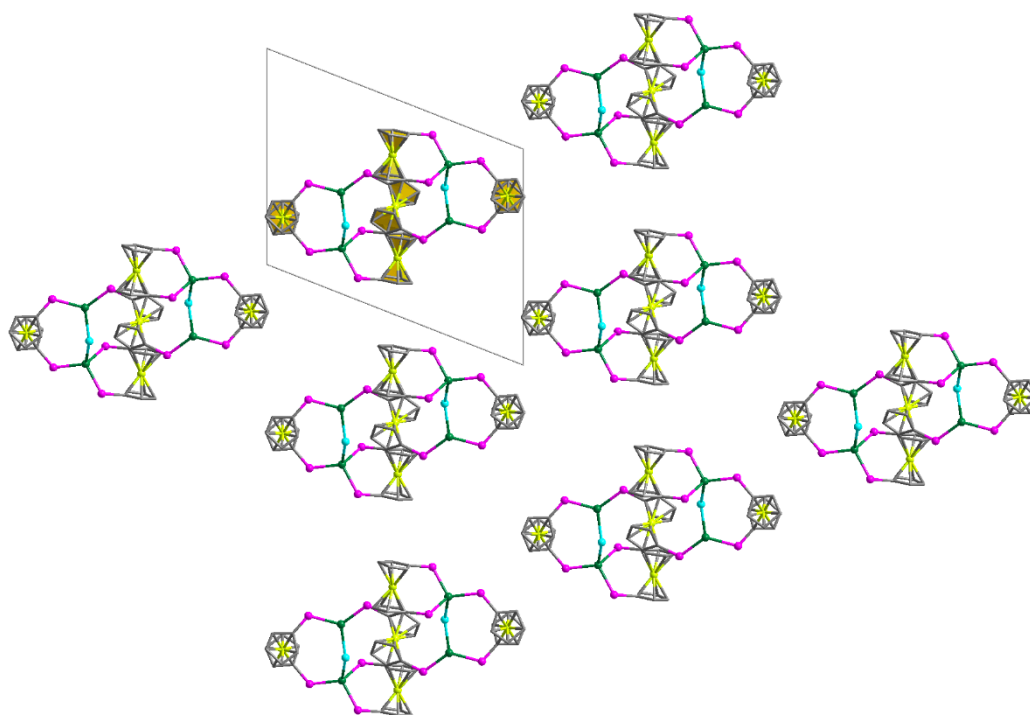

**Figure S12.** The packing structure of **2** along *a*-axis

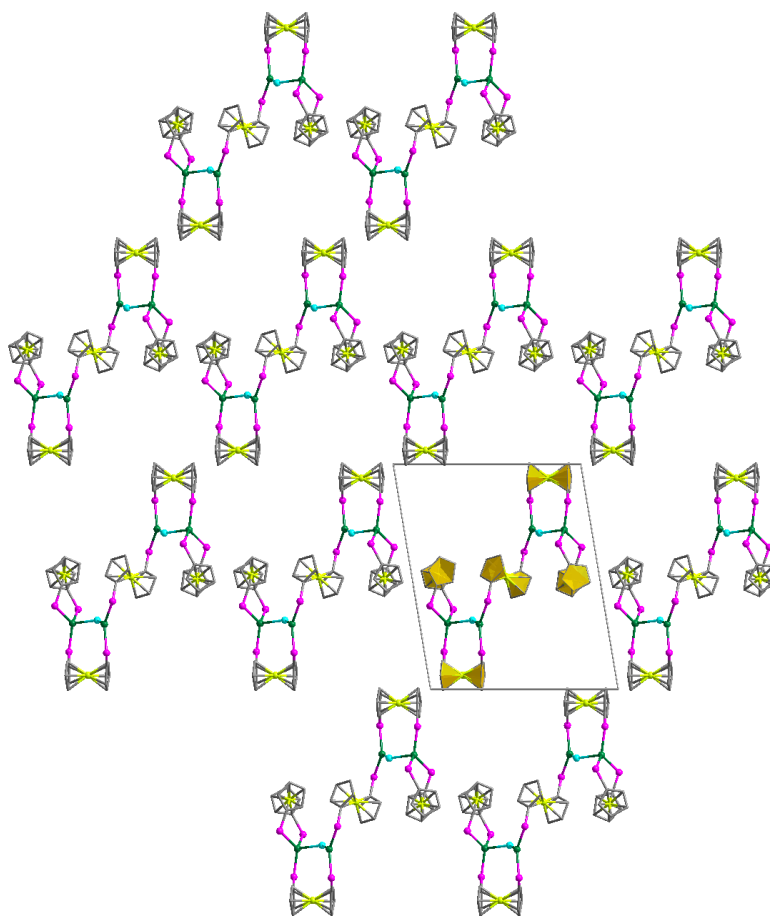

**Figure S13.** The packing structure of **2** along *b*-axis



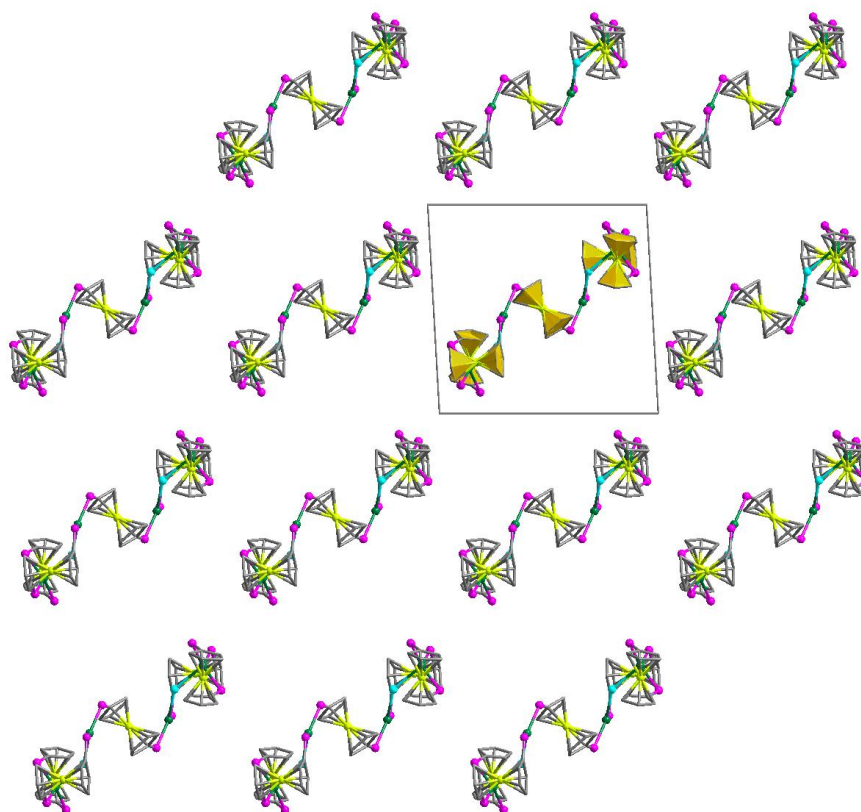

**Figure S14.** The packing structure of **2** along *c*-axis

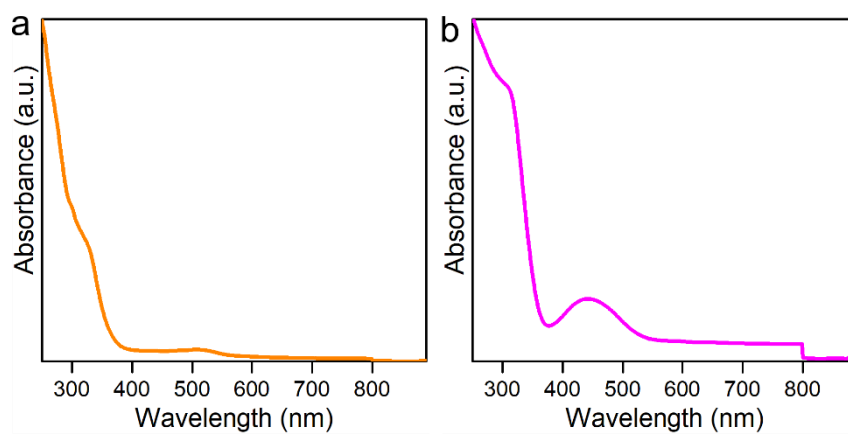

**Figure S15.** UV-Vis spectra of **1** and **2** in dichloromethane.

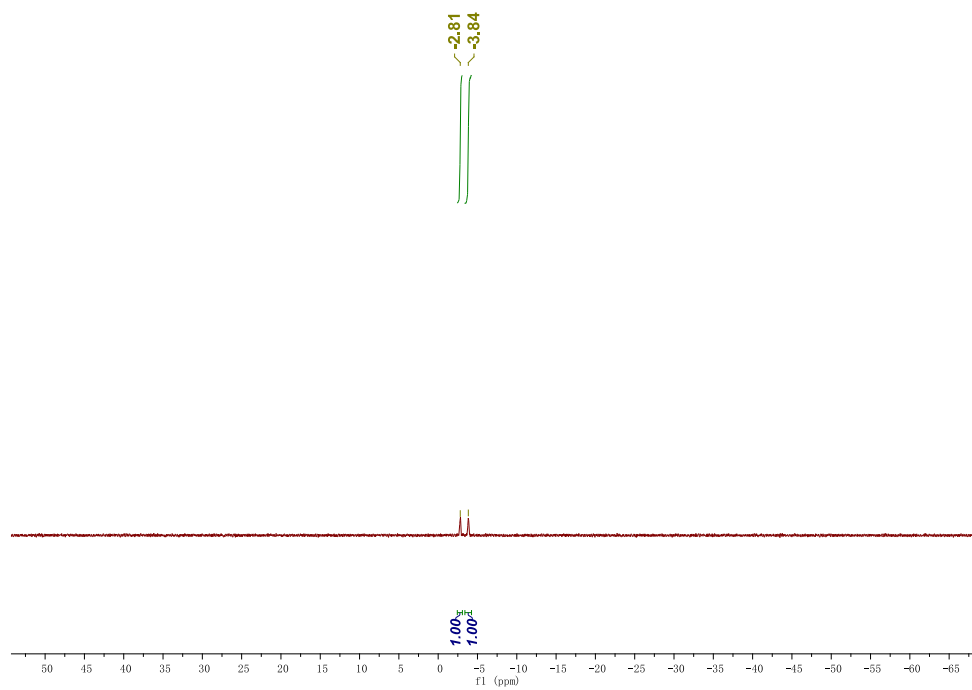

**Figure S16.** Proton-decoupled  $^{31}\text{P}$  NMR of **1** in  $\text{CDCl}_3$ .

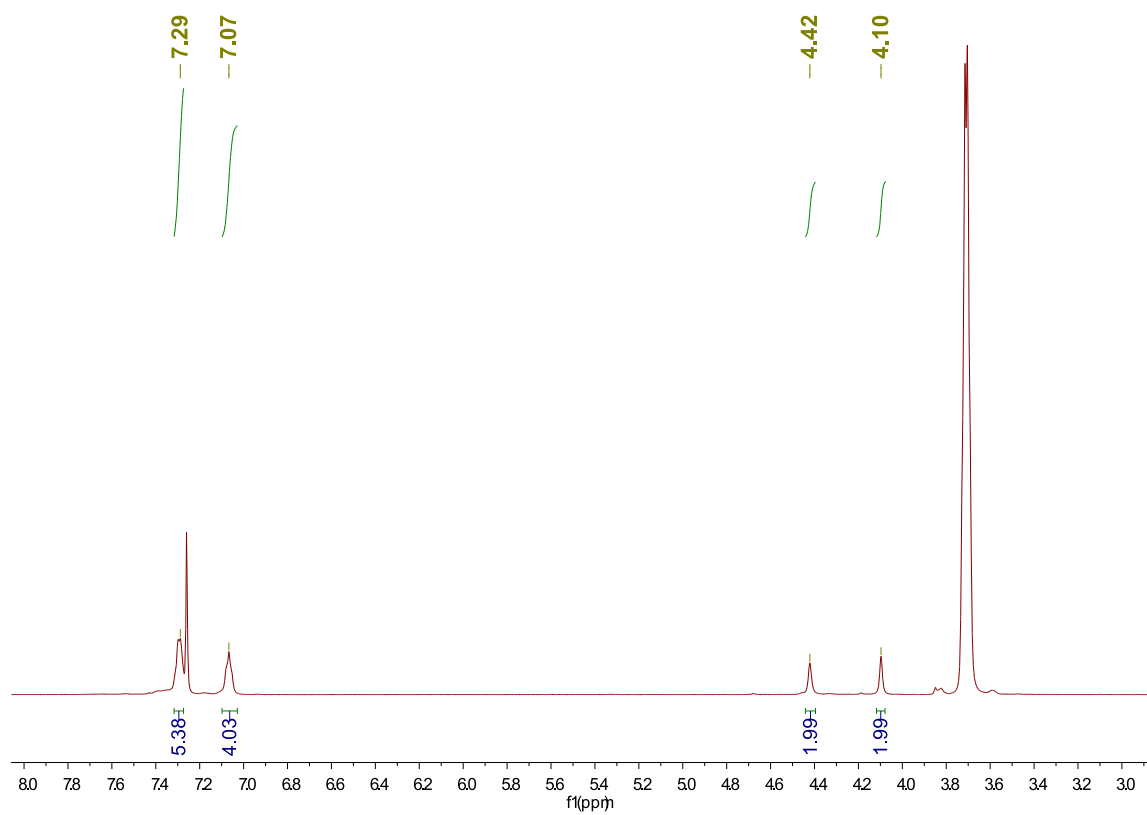

**Figure S17.**  $^1\text{H}$  NMR of **1** cluster in  $\text{CDCl}_3$ .

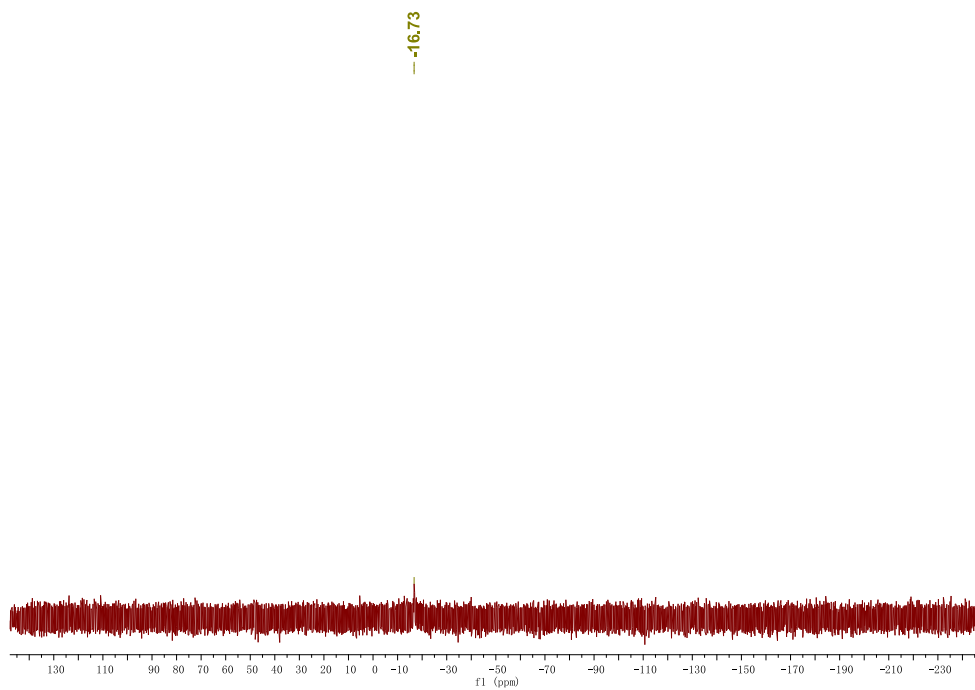

**Figure S18.** Proton-decoupled  $^{31}\text{P}$  NMR of **2** in  $\text{CDCl}_3$ .

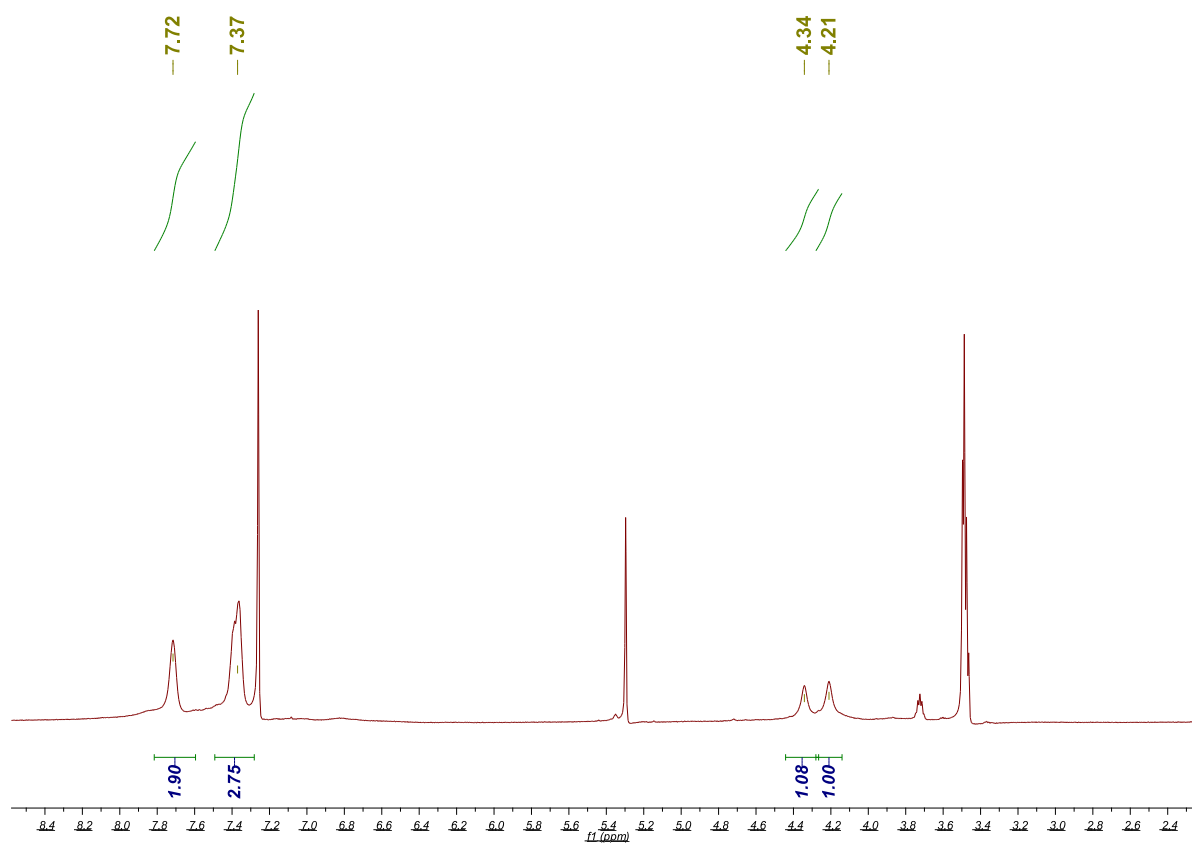

**Figure S19.**  $^1\text{H}$  NMR of **2** in  $\text{CDCl}_3$ .

**Table S1.** Crystallographic data of **1**.

|                                                |                                                             |
|------------------------------------------------|-------------------------------------------------------------|
| Identification code                            | <b>1</b>                                                    |
| Formula                                        | $C_{300}H_{216}Ag_{25.08}Cl_6Cu_{3.92}F_{24}Fe_6P_{12}Sb_2$ |
| Formula weight                                 | 8393.89                                                     |
| Temperature/K                                  | 100.15                                                      |
| Crystal system                                 | Monoclinic                                                  |
| Space group                                    | <i>Cc</i>                                                   |
| <b>a</b> (Å)                                   | 22.0344(2)                                                  |
| <b>b</b> (Å)                                   | 37.8184(3)                                                  |
| <b>c</b> (Å)                                   | 40.5275(4)                                                  |
| <b>α</b> (°)                                   | 90                                                          |
| <b>β</b> (°)                                   | 98.0040(10)                                                 |
| <b>γ</b> (°)                                   | 90                                                          |
| <b>V</b> (Å <sup>3</sup> )                     | 33442.8(5)                                                  |
| <b>Z</b>                                       | 4                                                           |
| <b>D<sub>c</sub></b> / (g cm <sup>-3</sup> )   | 1.667                                                       |
| Radiation                                      | Cu Kα (λ=1.54184 Å)                                         |
| Theta (°) range                                | 4.674 to 127.996                                            |
| Index ranges                                   | -25 ≤ h ≤ 25, -44 ≤ k ≤ 43, -40 ≤ l ≤ 47                    |
| Refls. Total                                   | 184596                                                      |
| Restraints                                     | 44057                                                       |
| Parameters                                     | 2883                                                        |
| <b>R<sub>int</sub></b>                         | 0.1084                                                      |
| <b>R<sub>I</sub>/wR<sub>2</sub></b> [I>2σ(I)]  | 0.0939/0.2349                                               |
| <b>R<sub>I</sub>/wR<sub>2</sub></b> (all data) | 0.1064/0.2474                                               |
| Goof                                           | 1.110                                                       |

**Table S2.** Crystallographic data of **2**.

|                                                |                                                                                                                                   |
|------------------------------------------------|-----------------------------------------------------------------------------------------------------------------------------------|
| Identification code                            | <b>2</b>                                                                                                                          |
| Formula                                        | C <sub>170</sub> H <sub>140</sub> Ag <sub>4</sub> Cl <sub>2</sub> F <sub>12</sub> Fe <sub>5</sub> P <sub>10</sub> Sb <sub>2</sub> |
| Formula weight                                 | 4079.18                                                                                                                           |
| Temperature/K                                  | 100.00(10)                                                                                                                        |
| Crystal system                                 | triclinic                                                                                                                         |
| Space group                                    | <i>P-1</i>                                                                                                                        |
| <b>a</b> (Å)                                   | 15.428(2)                                                                                                                         |
| <b>b</b> (Å)                                   | 15.617(2)                                                                                                                         |
| <b>c</b> (Å)                                   | 20.1332(17)                                                                                                                       |
| <b>α</b> (°)                                   | 68.798(11)                                                                                                                        |
| <b>β</b> (°)                                   | 81.147(9)                                                                                                                         |
| <b>γ</b> (°)                                   | 89.787(11)                                                                                                                        |
| <b>V</b> (Å <sup>3</sup> )                     | 4461.5(10)                                                                                                                        |
| <b>Z</b>                                       | 1                                                                                                                                 |
| <b>D<sub>c</sub></b> / (g cm <sup>-3</sup> )   | 1.518                                                                                                                             |
| Radiation                                      | Cu Kα (λ=1.54184 Å)                                                                                                               |
| Theta (°) range                                | 6.888 to 125                                                                                                                      |
| Index ranges                                   | -12 ≤ h ≤ 17, -17 ≤ k ≤ 17, -23 ≤ l ≤ 23                                                                                          |
| Refls. Total                                   | 25864                                                                                                                             |
| Restraints                                     | 935                                                                                                                               |
| Parameters                                     | 1041                                                                                                                              |
| <b>R<sub>int</sub></b>                         | 0.1580                                                                                                                            |
| <b>R<sub>I</sub>/wR<sub>2</sub></b> [I>2σ(I)]  | 0.0984/0.2123                                                                                                                     |
| <b>R<sub>I</sub>/wR<sub>2</sub></b> (all data) | 0.2354/0.2849                                                                                                                     |
| Goof                                           | 0.836                                                                                                                             |

**Table S3.** Selected bond lengths (Å) for compound **1**.

| Parameter | value     | Parameter | value     |
|-----------|-----------|-----------|-----------|
| Ag1-Ag3   | 2.938 (3) | Ag2-C200  | 2.62 (3)  |
| Ag1-Ag4   | 2.963 (3) | Ag2-C206  | 2.27 (3)  |
| Ag1-Ag5   | 2.944 (3) | Ag3-Ag4   | 3.192 (3) |
| Ag1-Ag7   | 2.962 (3) | Ag3-Ag5   | 3.180 (3) |
| Ag1-Ag8   | 2.958 (3) | Ag3-Ag8   | 2.830 (3) |
| Ag1-Ag9   | 2.954 (3) | Ag3-Ag9   | 2.847 (3) |
| Ag1-Ag10  | 2.971 (3) | Ag3-Cu3   | 2.925 (3) |
| Ag1-Ag12  | 2.951 (3) | Ag3-Cl13  | 2.735 (7) |
| Ag1-Ag13  | 2.958 (3) | Ag3-Cl180 | 2.45 (3)  |
| Ag1-Ag18  | 2.953 (3) | Ag3-Cl213 | 2.70 (3)  |
| Ag1-Ag20  | 2.953 (3) | Ag4-Ag5   | 3.195 (3) |
| Ag1-Ag22  | 2.959 (3) | Ag4-Ag7   | 2.866 (3) |
| Ag2-Cu1   | 2.735 (5) | Ag4-Ag20  | 2.850 (3) |
| Ag2-Cl15  | 2.639 (6) | Ag4-Cu3   | 2.910 (5) |
| Ag2-P1    | 2.372 (7) | Ag4-Cl15  | 2.774 (6) |
| Ag4-C187  | 2.48 (3)  | Ag7-Cu1   | 2.867 (4) |
| Ag4-C275  | 2.7 (3)   | Ag7-Cl1   | 2.754 (7) |
| Ag5-Ag12  | 2.852 (3) | Ag7-C82   | 2.61 (3)  |
| Ag5-Ag18  | 2.854 (3) | Ag7-C206  | 2.38 (3)  |
| Ag5-Cu3   | 2.903 (5) | Ag8-Ag9   | 2.843 (3) |
| Ag5-Cl13  | 2.605 (7) | Ag8-Ag13  | 3.184 (3) |
| Ag6-P2    | 2.386 (7) | Ag8-Ag18  | 3.212 (3) |
| Ag6-C282  | 2.28 (3)  | Ag8-Cu2   | 2.863 (5) |
| Ag7-Ag10  | 3.204 (3) | Ag8-Cl14  | 2.775 (7) |
| Ag7-Ag12  | 3.183 (3) | Ag8-C199  | 2.48 (2)  |
| Ag7-Ag20  | 2.846 (3) | Ag9-Ag20  | 3.193 (3) |
| Ag9-Ag22  | 3.181 (3) | Ag9-Cu4   | 2.873 (4) |
| Ag9-Cl12  | 2.757 (7) | Ag12-C200 | 2.34 (3)  |

|           |           |           |           |
|-----------|-----------|-----------|-----------|
| Ag9-C207  | 2.59 (3)  | Ag13-Ag18 | 3.188 (3) |
| Ag-C282   | 2.38 (3)  | Ag13-Ag22 | 2.851 (3) |
| Ag10-Ag12 | 3.206 (3) | Ag13-Cu2  | 2.907 (5) |
| Ag10-Ag13 | 2.855 (3) | Ag13-Cl12 | 2.750 (6) |
| Ag10-Ag22 | 2.846 (3) | Ag13-Ag22 | 2.851 (3) |
| Ag10-Cu1  | 2.893 (4) | Ag13-Cu2  | 2.907 (5) |
| Ag10-Cl16 | 2.729 (7) | Ag13-Cl12 | 2.750 (6) |
| Ag10-C179 | 2.62 (3)  | Ag13-C165 | 2.63 (3)  |
| Ag10-C281 | 2.34 (3)  | Ag13-C283 | 2.32 (3)  |
| Ag11-Cu3  | 2.741 (4) | Ag14-Cu3  | 2.745 (3) |
| Ag11-Cl15 | 2.603 (7) | Ag14-P5   | 2.387 (3) |
| Ag11-P4   | 2.413 (9) | Ag14-C180 | 2.69 (3)  |
| Ag11-C187 | 2.64 (3)  | Ag14-C187 | 2.22 (3)  |
| Ag11-C297 | 2.31 (3)  | Ag15-Cu1  | 2.732 (4) |
| Ag12-Ag18 | 2.853 (3) | Ag15-Cl16 | 2.616 (7) |
| Ag12-Cu1  | 2.866 (5) | Ag15-P7   | 2.346 (9) |
| Ag12-Cl15 | 2.761 (7) | Ag15-C200 | 2.33 (3)  |
| Ag12-C142 | 2.68 (3)  | Ag15-C281 | 2.50 (3)  |
| Ag16-Cu2  | 2.728 (5) | Ag19-C206 | 2.63 (3)  |
| Ag16-Cl14 | 2.618 (7) | Ag19-C281 | 2.40 (3)  |
| Ag16-P6   | 2.344 (8) | Ag20-Ag22 | 3.186 (3) |
| Ag16-C149 | 2.23 (3)  | Ag20-Cu4  | 2.866 (5) |
| Ag17-Cu2  | 2.731 (3) | Ag20-Cl13 | 2.787 (7) |
| Ag17-Cl12 | 2.634 (3) | Ag20-C172 | 2.35 (3)  |
| Ag17-P8   | 2.395 (3) | Ag20-C276 | 2.69 (3)  |
| Ag17-C199 | 2.21 (3)  | Ag21-Cu2  | 2.754 (5) |
| Ag17-C283 | 2.59 (3)  | Ag21-Cl16 | 2.670 (7) |
| Ag18-Cu2  | 2.885 (4) | Ag21-P3   | 2.358 (8) |
| Ag18-Cl16 | 2.733 (8) | Ag21-C149 | 2.61 (3)  |
| Ag18-C149 | 2.43 (2)  | Ag21-C283 | 2.32 (3)  |

|           |           |           |           |
|-----------|-----------|-----------|-----------|
| Ag18-C283 | 2.59 (3)  | Ag22-Cu4  | 2.873 (5) |
| Ag19-Cu1  | 2.783 (4) | Ag22-C11  | 2.777 (6) |
| Ag19-C11  | 2.688 (7) | Ag22-C268 | 2.42 (4)  |
| Ag19-P10  | 2.383 (8) | Ag22-C280 | 2.68 (4)  |
| Ag23-Cu4  | 2.73 (5)  | Fe1-C7    | 2.09 (3)  |
| Ag23-C11  | 2.777 (6) | Fe1-C44   | 2.08 (3)  |
| Ag23-P11  | 2.381 (9) | Fe1-C63   | 1.95 (3)  |
| Ag23-C172 | 2.25 (3)  | Fe1-C112  | 2.02 (3)  |
| Ag23-C268 | 2.37 (3)  | Fe1-C113  | 2.01 (3)  |
| Ag24-Cu3  | 2.719 (3) | Fe1-C114  | 2.09 (2)  |
| Ag24-C114 | 2.601 (3) | Fe1-C115  | 2.12 (2)  |
| Ag24-P9   | 2.393 (3) | Fe1-C116  | 2.06 (2)  |
| Ag24-C180 | 2.26 (3)  | Fe1-C117  | 1.99 (2)  |
| Ag24-C279 | 2.55 (3)  | Fe1-C118  | 2.06 (3)  |
| Ag25-Cu4  | 2.818 (5) | Fe2-C160  | 2.06 (2)  |
| Ag25-C112 | 2.673 (7) | Fe2-C161  | 2.01 (2)  |
| Ag25-P12  | 2.354 (9) | Fe2-C162  | 2.01 (2)  |
| Ag25-C268 | 2.37 (3)  | Fe2-C163  | 2.05 (2)  |
| Ag25-C282 | 2.68 (4)  | Fe2-C164  | 2.08 (2)  |
| Cu1-C200  | 2.08 (3)  | Fe2-C208  | 1.94 (2)  |
| Cu1-C206  | 1.95 (2)  | Fe2-C209  | 1.99 (2)  |
| Cu1-C281  | 1.98 (3)  | Fe2-C210  | 2.08 (2)  |
| Cu2-C149  | 1.99 (3)  | Fe2-C211  | 2.09 (2)  |
| Cu2-C199  | 2.09 (3)  | Fe2-C212  | 2.00 (2)  |
| Cu2-C283  | 2.02 (3)  | Fe3-C137  | 2.08 (2)  |
| Cu3-C180  | 2.13 (3)  | Fe3-C138  | 2.08 (2)  |
| Cu3-C187  | 1.95 (3)  | Fe3-C139  | 2.03 (2)  |
| Cu3-C279  | 1.97 (3)  | Fe3-C140  | 2.00 (2)  |
| Cu4-C172  | 2.05 (4)  | Fe3-C141  | 2.03 (2)  |
| Cu4-C268  | 2.09 (4)  | Fe3-C155  | 2.07 (2)  |



|          |          |          |          |
|----------|----------|----------|----------|
| Cu4-C282 | 2.02 (3) | Fe3-C156 | 2.10 (2) |
| Fe4-C201 | 2.05 (3) | Fe3-C157 | 2.10 (2) |
| Fe6-C191 | 2.00 (2) | Fe3-C158 | 2.08 (2) |
| Fe4-C202 | 2.08 (2) | Fe3-C159 | 2.06 (2) |
| Fe4-C203 | 2.08 (3) | Fe5-C150 | 2.08 (3) |
| Fe4-C204 | 2.05 (3) | Fe5-C151 | 2.05 (2) |
| Fe4-C205 | 2.03 (3) | Fe5-C152 | 2.03 (2) |
| Fe4-C284 | 2.08 (2) | Fe5-C153 | 2.05 (3) |
| Fe4-C285 | 2.06 (3) | Fe5-C154 | 2.08 (3) |
| Fe4-C286 | 1.99 (3) | Fe6-C132 | 2.04 (3) |
| Fe4-C287 | 1.96 (3) | Fe6-C133 | 1.91 (3) |
| Fe4-C288 | 2.02 (3) | Fe6-C134 | 2.00 (3) |
| Fe5-C107 | 2.09 (3) | Fe6-C135 | 2.18 (3) |
| Fe5-C108 | 2.05 (3) | Fe6-C136 | 2.20 (3) |
| Fe5-C109 | 2.03 (2) | Fe6-C188 | 2.08 (3) |
| Fe5-C110 | 2.06 (3) | Fe6-C189 | 2.06 (3) |
| Fe5-C111 | 2.09 (2) | Fe6-C190 | 2.00 (2) |
|          |          | Fe6-C192 | 2.05 (2) |

---

**Table S4.** Selected bond lengths (Å) for compound **2**.

| Parameter | value     | Parameter | value     |
|-----------|-----------|-----------|-----------|
| Ag1-Cl1   | 2.650(4)  | Ag2-P6    | 2.447(14) |
| Ag1-P1    | 2.400(5)  | Fe1-C2    | 1.977(15) |
| Ag1-P3    | 2.374(4)  | Fe1-C10   | 1.972(12) |
| Ag1-P4    | 2.483(4)  | Fe1-C24   | 2.014(16) |
| Ag2-Cl1   | 2.507(4)  | Fe1-C26   | 2.034(14) |
| Ag2-P2    | 2.417(5)  | Fe1-C33   | 2.059(15) |
| Ag2-P5    | 2.468(13) | Fe1-C36   | 1.995(17) |
| Fe1-C37   | 1.982(18) | Fe1-C38   | 2.052(13) |
| Fe1-C64   | 1.999(15) | Fe1-C66   | 2.008(19) |
| Fe2-C21   | 2.046(14) | Fe2-C32   | 2.095(16) |
| Fe2-C32   | 2.095(16) | Fe2-C49   | 2.064(18) |
| Fe2-C49   | 2.064(18) | Fe2-C54   | 2.036(19) |
| Fe2-C54   | 2.036(19) | Fe2-C58   | 2.070(17) |
| Fe2-C58   | 2.070(17) | Fe3-C42   | 2.043(10) |
| Fe3-C41   | 2.026(11) | Fe3-C43   | 2.062(10) |
| Fe3-C44   | 2.057(10) | Fe3-C69   | 2.073(13) |
| Fe3-C45   | 2.035(9)  | Fe3-C70   | 2.051(12) |
| Fe3-C68   | 2.055(12) | Fe3-C71   | 2.019(13) |
| Fe3-C72   | 2.021(12) |           |           |
